# Supplementary material for: Multi-responsive polymer nanoparticles from the amphiphilic poly(dimethylsiloxane) (PDMS)-containing poly(ether amine) (PDMS-gPEA) and its potential application for smart separation
Source: Royal Society of Chemistry journal article supplement (doi:10.1039/c0jm03569f), 2011-01-01
Supplement: c0jm03569f.pdf [file c0jm03569f.pdf]

**Supporting Information for:**  
**Multi-responsive polymer nanoparticle from the amphiphilic  
poly (dimethylsilane) (PDMS)-containing poly (ether amine)  
(PDMS-gPEA) and its potential application in the smart  
separation**

Chunfeng Di, Xuesong Jiang\*, Rui Wang, Jie Yin

School of Chemistry & Chemical Technology, State Key Laboratory for Metal

Matrix Composite Materials, Shanghai Jiao Tong University

Tel.: +86-21-54743268; Fax: +86-21-54747445

E-mail: [ponygle@sjtu.edu.cn](mailto:ponygle@sjtu.edu.cn)

The successful synthesis of PDMS-gPEA was confirmed by FTIR,  $^1\text{H}$  NMR and GPC. As shown in the FTIR spectra in Figure S1, the peaks at 3400 and 1020  $\text{cm}^{-1}$  are attributed to hydroxyl stretch and Si-O stretch for PDMS-gPEA respectively.

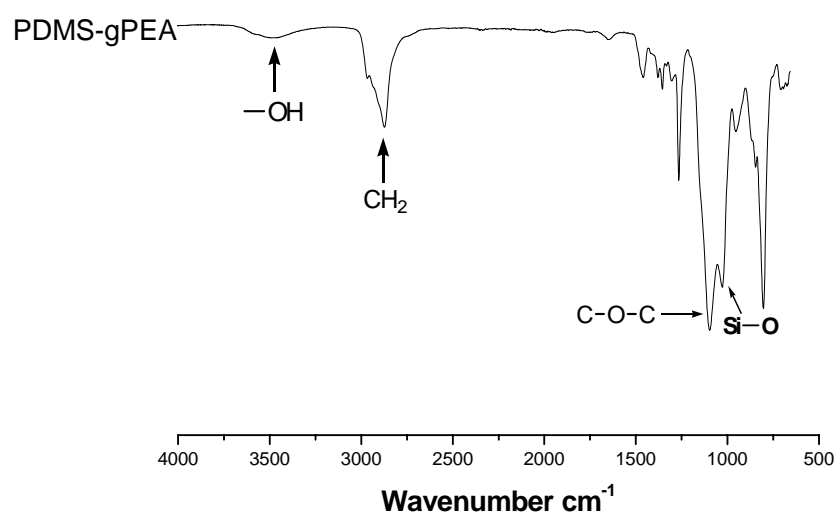

Figure S1. FTIR of PDMS-gPEA

The  $^1\text{H}$  NMR spectra of PDMS-gPEA in  $\text{CDCl}_3$  (Figure 2) exhibits signals at  $\delta=0.14$  and 1.3 ppm, which are assigned to protons of  $-\text{CH}_3$  of PDMS and protons of  $-\text{CH}_3$  of PPO, respectively. The existence of the two peaks further confirmed the successful synthesis of PDMS-gPEA.

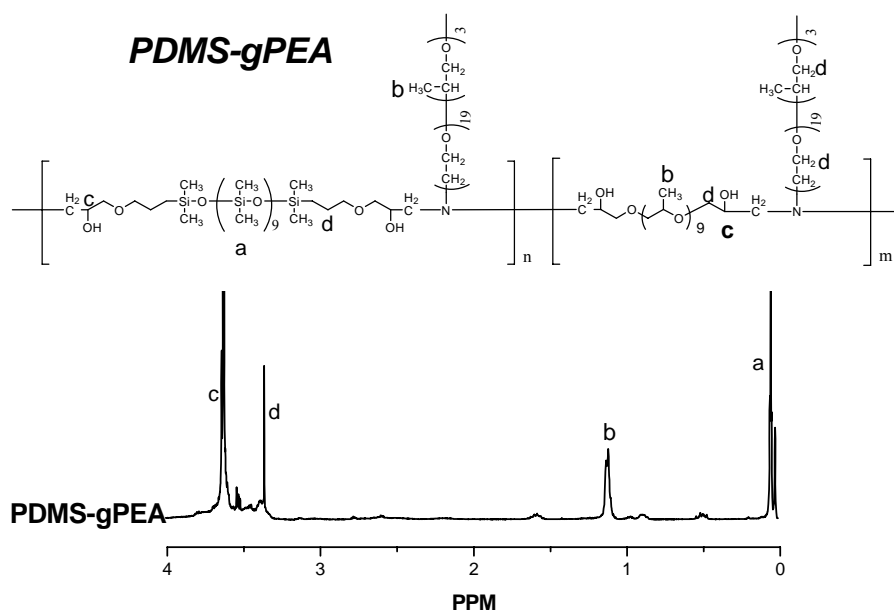

Figure S2.  $^1\text{H}$  NMR of PDMS-gPEA in  $\text{CDCl}_3$

Table S1. Properties of PDMS-gPEA

|           | Molar Ratio |         |        | $M_w^a$           | $M_n^a$           | $M_w/M_n^a$ |
|-----------|-------------|---------|--------|-------------------|-------------------|-------------|
|           | L100        | PDMS-DE | PPO-DE |                   |                   |             |
| PDMS-gPEA | 2           | 1       | 1      | $1.1 \times 10^4$ | $7.3 \times 10^3$ | 1.55        |

a. measured by GPC

b. pH=7.0

The detailed data of GPC are summarized in Table S1.

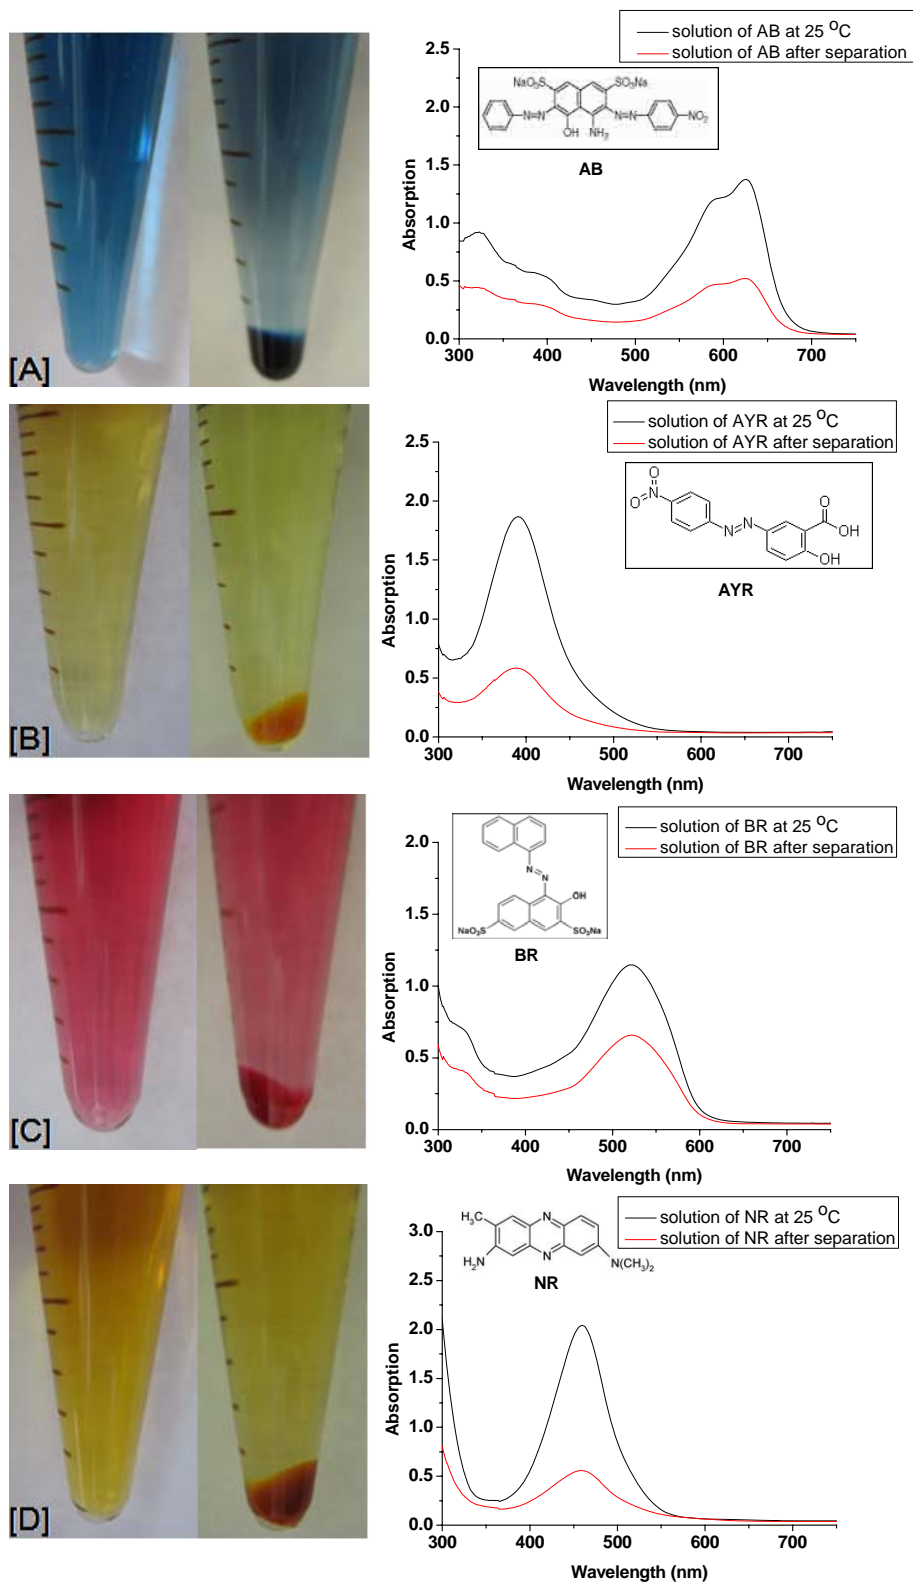

Figure S3. Separation of dyes using PDMS-gPEA. Left: photo graphs of dyes' solution before and after separation; right: UV-vis spectra of four water soluble dye solutions before and after separation.

([A] Amido black 10B , [B] Alizarin yellow R , [C] R Bordeaux red , [D] Neutral red )
